# Supplementary material
Source: PubMed Central journal article supplement (PMC3805234)
Supplement: supp_jit343_jit343supp.pdf [file supp_jit343_jit343supp.pdf]

**Procollagen III N-terminal propeptide and desmosine are released by  
matrix destruction in pulmonary tuberculosis**

Jo Seddon\*, Victoria Kasprowicz\*, Naomi F Walker\*, Ho Ming Yuen, Henry Sunpath, Liku Tezera, Graeme Meintjes, Robert J Wilkinson, William R Bishai, Jon S Friedland, & Paul T Elkington

Online data supplement

**Supplementary Table 1: Clinical characteristics of Durban patient cohort**

| Patient characteristics<br>n= 78        | Controls (n = 40) |           | TB patients (n = 38) |           |
|-----------------------------------------|-------------------|-----------|----------------------|-----------|
|                                         | n                 | Range     | n                    | Range     |
| Female                                  | 33                |           | 20                   |           |
| Mean Age                                | 36.9              | 21-55     | 32.9                 | 18-55     |
| HIV positive                            | 20                |           | 26                   |           |
| Mean BMI                                | 29.5              | 17.2-45.2 | 23.2                 | 16.1-44.8 |
| Mean CD4 count in HIV positive subjects | 476.9             | 231-940   | 323.6                | 25- 949   |

**Supplementary Table 2. Simple logistic regression against outcome TB status against each of the rescaled factors**

| Univariate model <sup>1</sup> | Odds Ratio | 95% CI         | p     |
|-------------------------------|------------|----------------|-------|
| PIINP (×100)                  | 1.011      | (1.004, 1.017) | 0.001 |
| BMI (kg/m <sup>2</sup> )      | 0.917      | (0.850, 0.988) | 0.023 |
| MMP-2 (×1000)                 | 0.979      | (0.966, 0.992) | 0.002 |
| MMP-7 (×100)                  | 1.061      | (1.012, 1.113) | 0.014 |
| MMP-8 (×100)                  | 1.036      | (1.007, 1.065) | 0.013 |
| PIICP (×100)                  | 1.004      | (0.997, 1.011) | 0.289 |

## **Supplementary figure legend**

**Supplementary figure 1: Induced sputum desmosine concentrations correlate with MMP-1, -3, -7 and -10.** Desmosine concentration was analyzed by ELISA in induced sputum from HIV negative patients with pulmonary TB and uninfected controls and MMPs were measured by luminex multiplex array. Correlations between analytes were studied by Spearman's analysis.

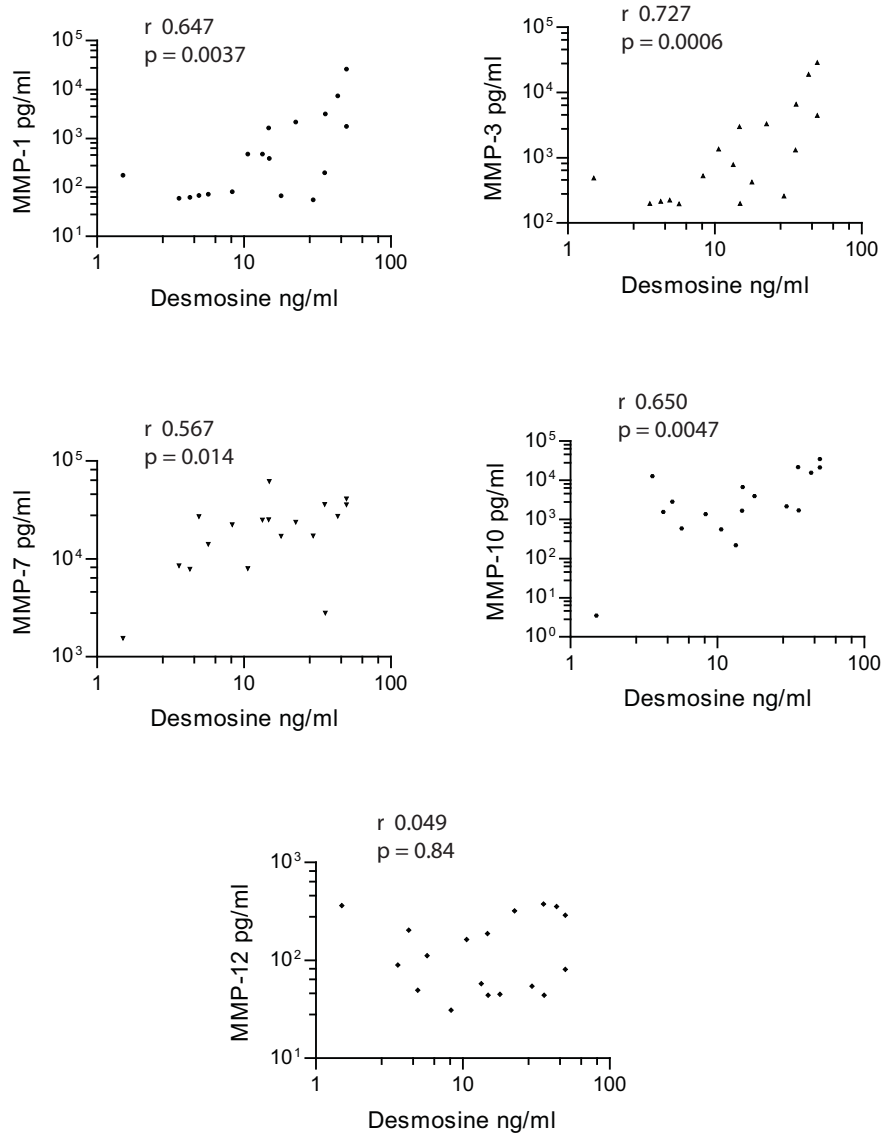

Supplementary Figure 1
